# Supplementary material
Source: publisher figshare collection journal article supplement (https://acs.figshare.com/ndownloader/files/22169277)
Supplement: Supplementary file 1 [file 22169277]

## Supporting Information

### **Thiourea-Based Extraction and Deposition of Gold for Electroless Nickel Immersion Gold Process**

*Jieun Son<sup>a</sup>, Yeongran Hong<sup>b</sup>, Cafer T. Yavuz<sup>b</sup>, Jong-In Han<sup>a,\*</sup>*

<sup>a</sup> Department of Civil and Environmental Engineering, Korea Advanced Institute of Science and Technology, 291 Daehak-ro, Yuseong-gu, Daejeon, 34141, Republic of Korea

<sup>b</sup> Department of Chemical and Biomolecular Engineering, Korea Advanced Institute of Science and Technology, 291 Daehak-ro, Yuseong-gu, Daejeon, 34141, Republic of Korea

\*Corresponding author. E-mail address: [hanj2@kaist.ac.kr](mailto:hanj2@kaist.ac.kr); Tel: +82-42-350-3629; Fax; +82-42-350-3610

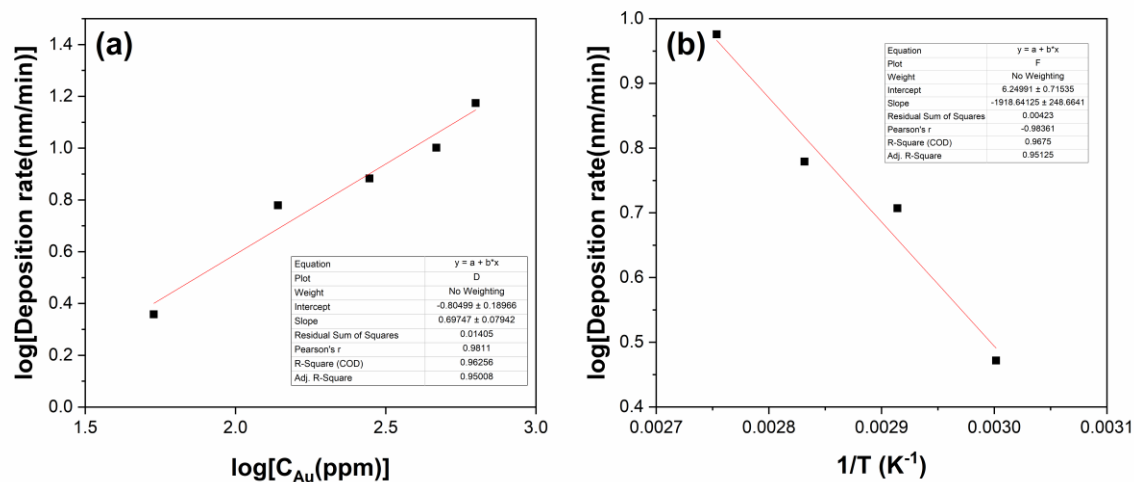

**Figure S1.** Linear regression of (a) logarithm of deposition rate and gold concentration (b) logarithm of deposition rate and  $1/T$ .

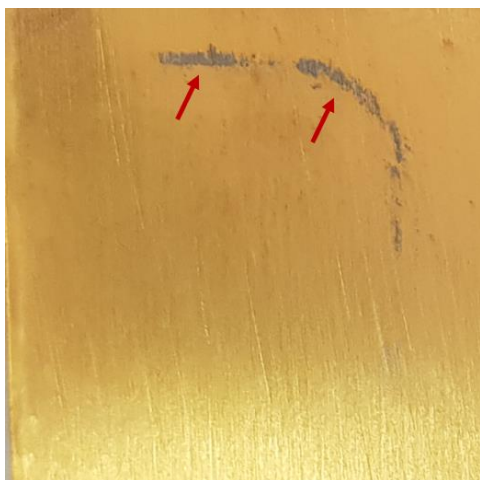

**Figure S2.** Photographic image of IG coating with the deposition condition of 50 ppm Au after a mild physical attack.
